# Supplementary material
Source: publisher figshare collection journal article supplement (https://acs.figshare.com/ndownloader/files/9885481)
Supplement: Supplementary file 1 [file 9885481]

**Sunlight-Induced Selective Photocatalytic Degradation of Methylene Blue in Bacterial Culture by Pollutant Soot Derived Nontoxic Graphene Nanosheets**

Prateek Khare,<sup>†¶</sup> Anupriya Singh,<sup>†¶</sup> Sankalp Verma,<sup>‡</sup> Anshu Bhati,<sup>†</sup> Amit Kumar Sonker,<sup>‡</sup>  
Kumud Malika Tripathi,<sup>§\*</sup> and Sumit Kumar Sonkar<sup>\*†</sup>

<sup>†</sup>Department of Chemistry, Malaviya National Institute of Technology, Jaipur, Jaipur-302017, India

<sup>‡</sup>Department of Materials Science & Engineering, Indian Institute of Technology, Kanpur, Kanpur-208016, India

<sup>§</sup>Department of Bio-nanotechnology, Gachon University, South Korea

\*Corresponding authors: E-mail: [sksonkar.chy@mnit.ac.in](mailto:sksonkar.chy@mnit.ac.in), [kumud20010@gmail.com](mailto:kumud20010@gmail.com)

Table of contents of supporting information

1. Figure S1: Photocatalytic test
2. Table 1: Comparative study of photodegradation performance by different graphene based nano-composites under the influence of sunlight

**1. Photocatalytic Test:**

A detailed aqueous phase photodegradation study of MB<sup>1</sup> under sunlight irradiation for wsGNS and GNS are shown in Figure S1 (a), carried out in different conditions for the comparison purpose. The continuous change in the concentration (concerning the decolourization) of MB by GNS and wsGNS (Figure S1 (a)) in sunlight was observed under at different time intervals using the UV-Vis absorbance spectroscopy. The rate constant data were evaluated from the corresponding experimental data (Figure S1 (a)) by assuming pseudo first-order kinetics and the linear fitting of pseudo first-order kinetics is shown in figure S1 (b).

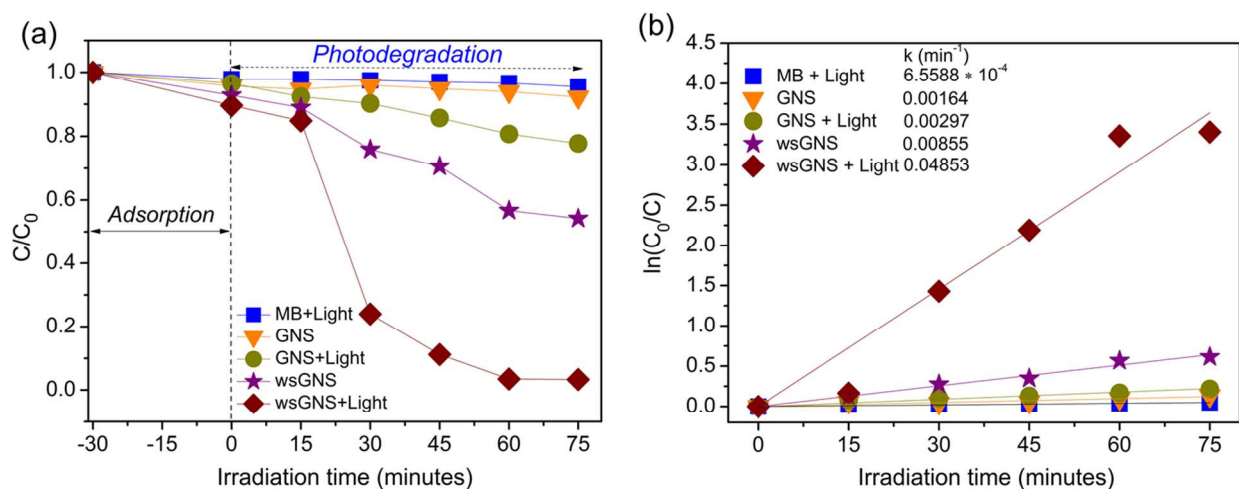

**Figure S1:** Extent of (a) Plot of  $C/C_0$  for MB photodegradation by wsGNS under sunlight irradiation with adsorption as background tests; (b) Plot of  $\ln(C_0/C)$  for MB photodegradation by different samples.

**2. Table 1:** Comparative study of photodegradation performance by different graphene based nano-composites under the influence of sunlight.

| S. No. | Materials                                                       | Degradation efficiency | Degradation time (minutes) | Rate constant value ( $\text{min}^{-1}$ ) | Reference            |
|--------|-----------------------------------------------------------------|------------------------|----------------------------|-------------------------------------------|----------------------|
| 1.     | Graphene- $\text{V}_2\text{O}_5$ nanocomposite                  | 99%                    | 90                         | 0.0366                                    | 2                    |
| 2.     | Hemin-functionalized graphene hydrogel (Hem/GH)                 | 96 %                   | 180                        | 0.017                                     | 3                    |
| 3      | Graphene- $\text{SnO}_2$ -PMMA Nanocomposite                    | 99%                    | 60                         | 0.0488                                    | 4                    |
| 4      | ZnO flower/reduced graphene oxide composite                     | 97%                    | 150                        | 0.0395                                    | 5                    |
| 5      | ZnO-RGO/ $\text{RuO}_2$ Nanocomposites                          | 99%                    | 60                         | -                                         | 6                    |
| 6      | Graphene- $\text{SnO}_2$ composites                             | 99%                    | 5                          | -                                         | 7                    |
| 7      | $\text{ZnFe}_2\text{O}_4/\text{ZnO}$ nanocomposites on graphene | 99%                    | 120                        | 0.0330                                    | 8                    |
| 8      | Graphene- $\text{ZnTiO}_3$ nanocomposite                        | >95%                   | 60                         | -                                         | 9                    |
| 9      | Water soluble graphene nanosheets (wsGNS)                       | 97 %                   | <sup>‡</sup> 60            | 0.04853                                   | <b>Present study</b> |
|        |                                                                 | 99.9%                  | <sup>±</sup> 90            |                                           |                      |

<sup>‡</sup>Based on the UV-visible absorption spectroscopy as described in Figure 3.

<sup>±</sup>Based on NMR results as described in Figure 7.

## References:

- 1) Singh, A.; Khare, P.; Verma, S.; Bhati, A.; Sonker, A. K.; Tripathi, K. M.; Sonkar, S. K. Pollutant Soot for Pollutant Dye Degradation: Soluble Graphene Nanosheets for Visible Light Induced Photodegradation of Methylene Blue. *ACS Sustain. Chem. Eng.* **2017**, 5, 8860-8869.
- 2) Shanmugam, M.; Alsalmeh, A.; Alghamdi, A.; Jayavel, R. Enhanced Photocatalytic Performance of the Graphene-V<sub>2</sub>O<sub>5</sub> Nanocomposite in the Degradation of Methylene Blue Dye Under Direct Sunlight. *ACS Appl. Mater. Interfaces.* **2015**, 7 (27), 14905–14911.
- 3) Zhao, Y.; Zhang, Y.; Liu, A.; Wei, Z.; Liu, S. Construction of Three-Dimensional Hemin-Functionalized Graphene Hydrogel with High Mechanical Stability and Adsorption Capacity for Enhancing Photodegradation of Methylene Blue. *ACS Appl. Mater. Interfaces.* **2017**, 9 (4), 4006–4014.
- 4) Shanmugam, M.; Alsalmeh, A.; Alghamdi, A.; Jayavel, R. Photocatalytic Properties of Graphene-SnO<sub>2</sub>-PMMA Nanocomposite in the Degradation of Methylene Blue Dye under Direct Sunlight Irradiation. *Mater. Express.* **2015**, 5 (4), 319-326.
- 5) Xu, S.; Fu, L.; Pham, T. S. H.; Yu, A.; Han, F.; Chen, L. Preparation of ZnO Flower/Reduced Graphene Oxide Composite with Enhanced Photocatalytic Performance under Sunlight. *Ceram. Int.* **2015**, 41, 4007-4013.
- 6) Reddy, D. A.; Ma, R.; Kim, T. K. Efficient Photocatalytic Degradation of Methylene Blue by Heterostructured ZnO-RGO/RuO<sub>2</sub> Nanocomposite under the Simulated Sunlight Irradiation. *Ceram. Int.* **2015**, 41 (5), 6999-7009.
- 7) Seema, H.; Kemp, K. C.; Chandra, V.; Kim, K. S. Graphene-SnO<sub>2</sub> Composites for Highly Efficient Photocatalytic Degradation of Methylene Blue under Sunlight. *Nanotechnology.* **2012**, 23, 355705-355713.
- 8) Sun, L.; Shao, R.; Tang, L.; Chen, Z., Synthesis of ZnFe<sub>2</sub>O<sub>4</sub>/ZnO Nanocomposites Immobilized on Graphene with Enhanced Photocatalytic Activity under Solar Light Irradiation. *J. Alloys Compd.* **2013**, 564, 55-62.
- 9) Gayathri, S.; Jayabal, P.; Kottaisamy, M.; Ramakrishnan, V., Synthesis of the Graphene-ZnTiO<sub>3</sub> Nanocomposite for Solar Light Assisted Photodegradation of Methylene Blue. *J. Phys. D: Appl. Phys.* **2015**, 48, 415305-415315.
